# Supplementary material for: The Effect of a Combined Modified Pectoral and Stellate Ganglion Block on Stress and Inflammatory Response in Patients Undergoing Modified Radical
Source: Research Square preprint supplement (doi:10.21203/rs.3.rs-347346/v1), 2021-03-29
Supplement: Supplementary file 2 [file a88946ff3980e4fa18bf4f53.xlsx]

## Sheet: Sheet1
	SGB Group	Control Group
Variable	(n=25）	(n=25）	P
Age (years), mean±SD	54.52±7.81	55.76±9.59	0.62
ASA mean±SD	1.84±0.37	1.88±0.32	0.690931
Height(cm) mean±SD	158.40±4.86	158.56±4.62	0.907434
Weight(kg) mean±SD	61.78±9.45	58.35±8.22	0.186309
Time of operation(min) mean±SD	102.08±27.75	99.52±19.90	0.715054
